# Supplementary material for: A controlled alkaline treatment of Al-SBA-15: a facile route to adjust the chemical composition and synthesize an ordered mesoporous carbon material, CMK-3, possessing strong pressure resistant capability
Source: Royal Society of Chemistry journal article supplement (doi:10.1039/c7nj01914a), 2017-01-01
Supplement: c7nj01914a1.pdf [file c7nj01914a1.pdf]

## Supplementary Information

### **Controlled Alkaline Treatment of Al-SBA-15: A Facile Route to Adjust Chemical Composition and Synthesize Ordered Mesoporous Carbon Material CMK-3 Possessing Strong Pressure Resistant Capability**

Sen Lin <sup>a\*</sup>, Ruiyun Liu <sup>a</sup>, Niping Li <sup>b</sup>, Peng Guo <sup>c</sup>, Lei Shi <sup>b\*</sup>

- <sup>a</sup> College of Materials Science and Engineering, Qingdao University of Science and Technology, No. 53 Zhengzhou Road, Shibei District, Qingdao 266042, China
- <sup>b</sup> School of Chemistry and Pharmaceutical Engineering, Qilu University of Technology, Daxue Road 3501, Changqing District, Jinan, 250353, China
- <sup>c</sup> Qingdao Institute of Bioenergy and Bioprocess Technology, Chinese Academy of Sciences, No. 189 Songling Road, Laoshan District, Qingdao 266101, China

- \* Corresponding author: Sen Lin  
College of Materials Science and Engineering, Qingdao University of Science and Technology, No. 53 Zhengzhou Road, Shibei District, Qingdao 266042, China  
Phone: +86-532-84022814  
Fax: +86-532-84022814  
e-mail: [qk\\_linsen@163.com](mailto:qk_linsen@163.com)

Corresponding author Lei Shi  
Shandong Provincial Key Laboratory of Fine Chemicals, Qilu University of Technology, Daxue Road 3501, Changqing District, Jinan, 250353, China  
Phone: +86-531-89631760  
Fax: +86-531-89631760  
e-mail: [qg\\_shilei@163.com](mailto:qg_shilei@163.com)

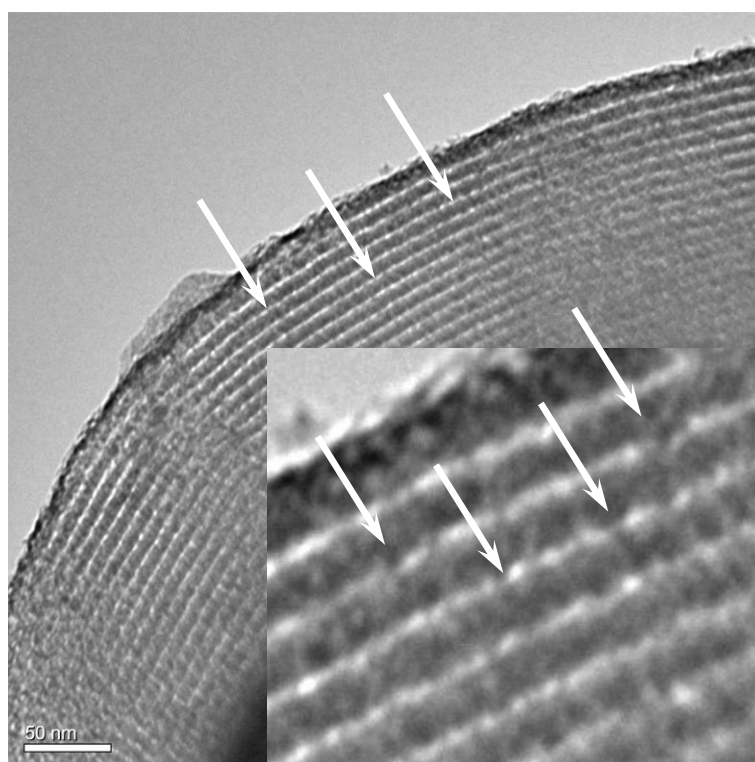

SI Figure 1 TEM image of CMK-3-1.

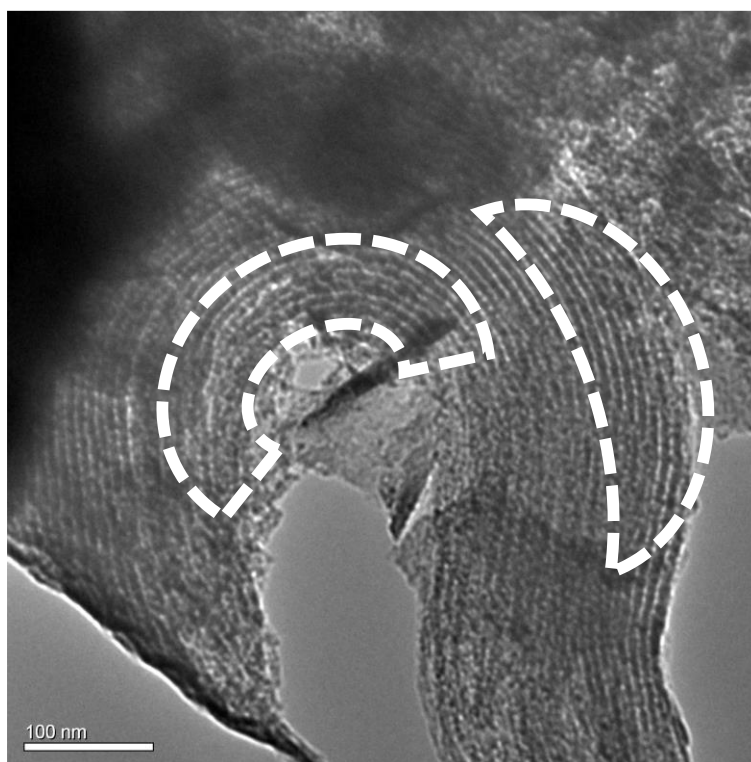

SI Figure 2 TEM image of CMK-3-2.

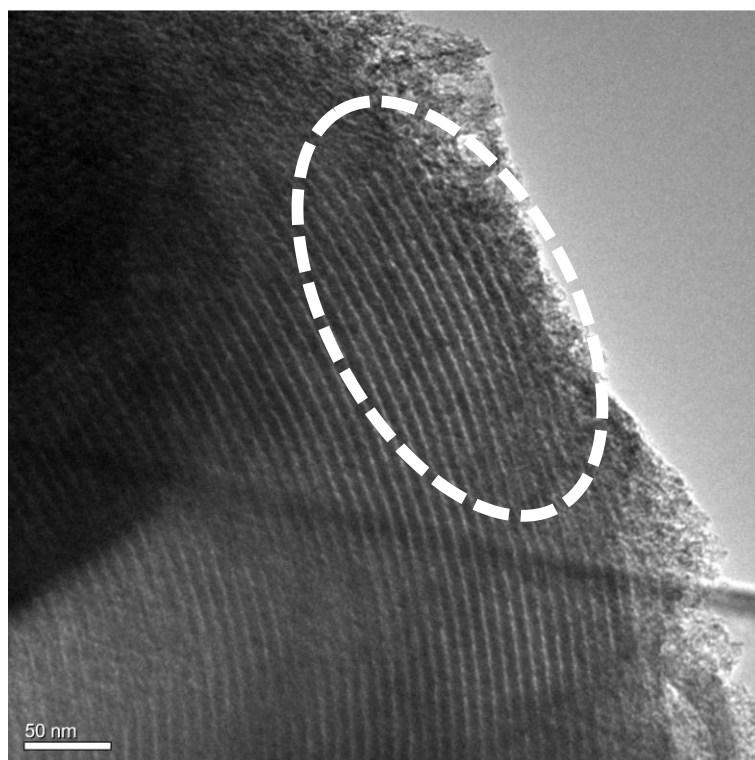

SI Figure 3 TEM image of CMK-3-4.

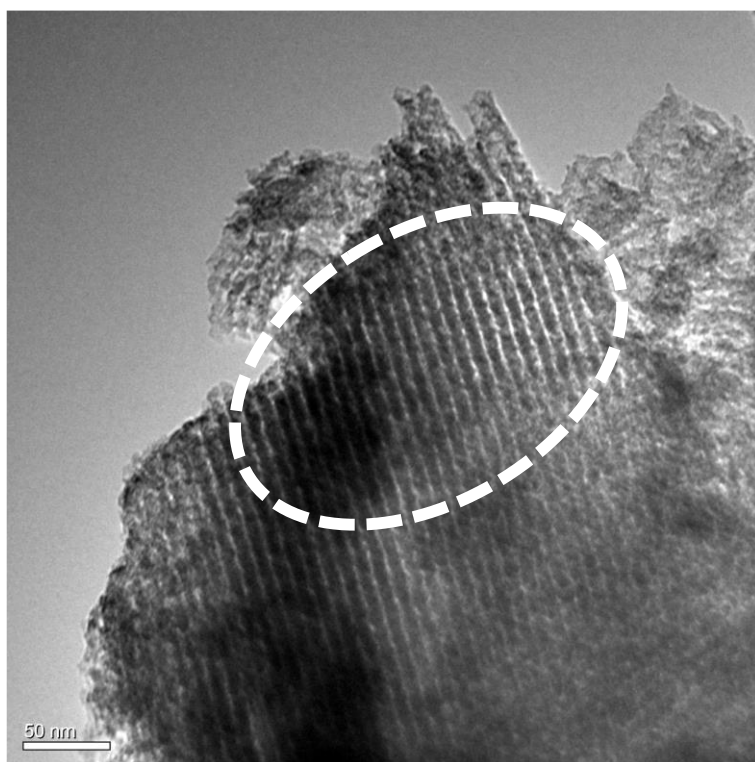

SI Figure 4 TEM image of CMK-3-8.
